# Supplementary material
Source: PubMed Central journal article supplement (PMC5580795)
Supplement: NIHMS60564-supplement-Supporting_Information.pdf [file NIHMS60564-supplement-Supporting_Information.pdf]

# **European Journal of Immunology**

**Supporting Information**

**for**

**Eur. J. Immunol. 10.1002/eji.200737423**

**CTLA-4 disrupts ZAP70 microcluster formation with reduced T cell/APC  
dwell times and calcium mobilization**

Helga Schneider, Xin Smith, Hebin Liu, Georges Bismuth and Christopher E. Rudd

## Supplemental Figure 1

### Movie 1

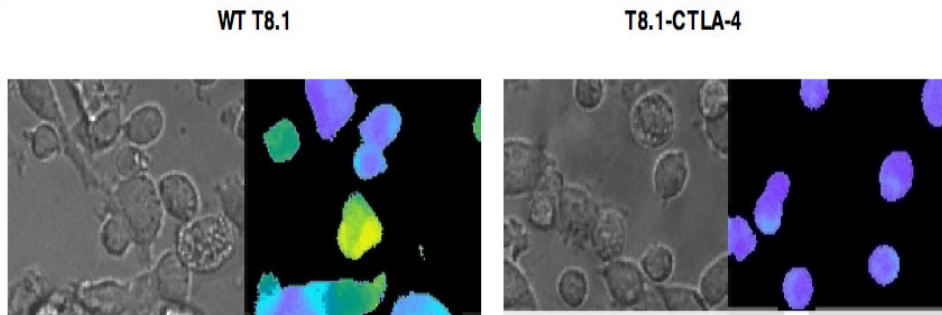

### Movie 2

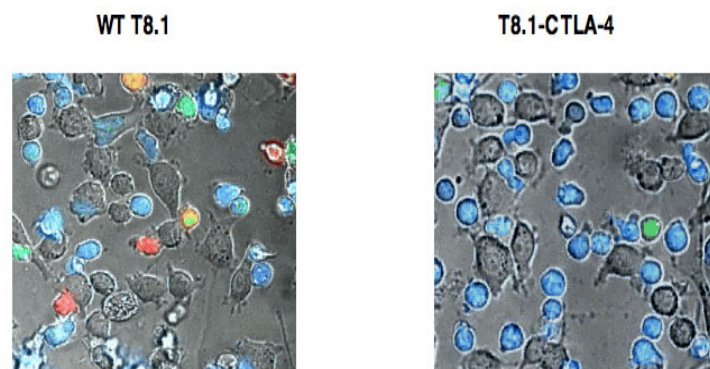

**Movies 1 and 2.** Calcium response of T8.1 cells interacting with APC. L625.7 cells were plated on glass coverslips mounted on Petri dishes and incubated with antigen [1  $\mu\text{g}/\text{mL}$  Ttox (830–843) peptide] for 18 h at 37°C before addition of WT T8.1 cells (movie 1) or CTLA-4-expressing T8.1 cells (movie 2) previously loaded with Fura-2/AM. Transmitted light and intracellular calcium levels (shown as pseudocolor images corresponding to 340/380 ratios) were acquired every 10 s during 20 min. Movies were made with the Metafluor software.
